# Supplementary material
Source: publisher figshare collection journal article supplement (https://adisjournals.figshare.com/ndownloader/files/37386238)
Supplement: Supplementary file 1 [file 37386238]

Adis

OPEN

1 ACCESS

PEER-REVIEWED  
FEATURE

# Real-World Effectiveness and Safety of Insulin Glargine 300 U/mL in Insulin-Naïve People with Type 2 Diabetes: the ATOS Study

Authors: Gagik R Galstyan<sup>1</sup>, Amir Tirosh<sup>2</sup>, Hernando Vargas-Uricoechea<sup>3</sup>, Maria Aileen Mabunay<sup>4</sup>, Mathieu Coudert<sup>5</sup>, Mubarak Naqvi<sup>6</sup>, Valerie Pilorget<sup>5</sup>, Niaz Khan<sup>7</sup>

Affiliations: <sup>1</sup>Endocrinology Research Centre of Health Care Ministry of Russian Federation, Dmitriya Ulyanova, Moscow, Russia; <sup>2</sup>Division of Endocrinology, Diabetes and Metabolism, Chaim Sheba Medical Center, Tel Hashomer, and Tel Aviv University, Tel Aviv, Israel; <sup>3</sup>Division of Endocrinology and Metabolism, Department of Internal Medicine, Universidad del Cauca, Popayan-Cauca, Colombia; <sup>4</sup>Sanofi, Singapore; <sup>5</sup>Sanofi, Paris, France; <sup>6</sup>Sanofi, Mumbai, India; <sup>7</sup>Imperial College London Diabetes Centre, Al Ain, United Arab Emirates

Diabetes Ther. DOI: [10.1007/s13300-022-01266-4](https://doi.org/10.1007/s13300-022-01266-4)

|                                                                                                           |                                                                                                           |                                                                                                                |                                                                                                              |                                                                                                            |
|-----------------------------------------------------------------------------------------------------------|-----------------------------------------------------------------------------------------------------------|----------------------------------------------------------------------------------------------------------------|--------------------------------------------------------------------------------------------------------------|------------------------------------------------------------------------------------------------------------|
|  <div>Introduction</div> |  <div>Study design</div> |  <div>Results: Efficacy</div> |  <div>Results: Safety</div> |  <div>Conclusions</div> |
|-----------------------------------------------------------------------------------------------------------|-----------------------------------------------------------------------------------------------------------|----------------------------------------------------------------------------------------------------------------|--------------------------------------------------------------------------------------------------------------|------------------------------------------------------------------------------------------------------------|

Introduction



Gla-300 is a **second-generation basal insulin analogue**, which has a more **stable and prolonged PK/PD profile** compared with the first-generation basal insulin analogue Gla-100<sup>1</sup>



**Efficacy and safety of Gla-300** has been demonstrated in **randomised clinical trials** and **real-world studies** that were conducted mostly in **US** and **Western Europe**<sup>2-7</sup>



**Objective: ATOS study** evaluated the **real-world effectiveness** and **safety** of **Gla-300** in **wider geographic regions** (Asia, the Middle East, North Africa, Latin America, and Eastern Europe)

Study design

**A Toujeo® Observational Study (ATOS):** a 12-month prospective, observational study in people with T2DM who initiated Gla-300 therapy after OAD failure



05 regions



18 countries



4422 participants





Included population



≥18 years of age



Uncontrolled T2DM



HbA<sub>1c</sub> >7.0% to ≤11.0%



One or more OADs



Insulin naïve

The **primary endpoint** was achievement of a predefined **individualised HbA<sub>1c</sub> target\*** at **Month 6**

\*Individualised HbA<sub>1c</sub> goal was set by the treating physician at study entry and titration was performed by the treating physician at their discretion using locally applicable titration algorithms

Results: Efficacy

**Patient characteristics (N=4422)**



Mean age: **57.2 years**



Women: **51.8%**



Mean HbA<sub>1c</sub>: **9.28%**



Mean duration of diabetes: **10.2 years**



Mean physician-set individualised HbA<sub>1c</sub> target: **7.0%**

**Effectiveness outcomes**



| Time Point         | Individualised HbA <sub>1c</sub> target | HbA <sub>1c</sub> <7.5% | HbA <sub>1c</sub> <8.0% |
|--------------------|-----------------------------------------|-------------------------|-------------------------|
| Month 3* (n=3704)  | 12.9%                                   | 23.9%                   | 43.1%                   |
| Month 6* (n=3931)  | 25.2%                                   | 41.3%                   | 65.3%                   |
| Month 12* (n=3748) | 44.5%                                   | 64.0%                   | 81.5%                   |

**Primary endpoint** (Month 6): 25.2%

- ~**25%** of participants achieved their predefined individualised HbA<sub>1c</sub> target **6 months** after receiving **Gla-300** (primary endpoint); this proportion increased to ~**45%** by **12 months**
- Proportion of patients achieving HbA<sub>1c</sub> targets of **<7.5%** and **<8.0%** also **increased** from baseline to Month 6 and Month 12

\*The 3-month period was defined as from the first treatment administration to visit 2 (Month 3); the 6-month period was defined as from the first treatment administration to visit 3 (Month 6) or treatment discontinuation, whichever occurred first, and the 12-month treatment period was defined as from the first treatment administration to visit 4 (Month 12) or treatment discontinuation, whichever occurred first.

Results: Safety



Incidence of hypoglycaemia was low and very few participants reported severe hypoglycaemia



Body weight change was minimal



The incidence of AEs was low, with fewer than 1% of participants reporting AEs related to the study treatment, including one SAE



**Incidence of symptomatic hypoglycaemia (N=4422)**

Incidence of BG ≤3.9 mmol/L was **0.86%** at Month 6 and **1.27%** at Month 12

Incidence of BG <3.0 mmol/L was **0.11%** at Month 6 and **0.20%** at Month 12

Very few participants reported severe hypoglycaemia at 6 (n=5; [**0.11%**]) and 12 months (n=4; [**0.14%**])



**Safety outcomes (N=4422)**

Overall, **treatment emergent AEs** were reported in **6.4%** participants

Any **treatment related AEs** were reported in **0.3%** participants

**SAEs** were observed in **1.3%** participants

Conclusions



Initiation of **Gla-300** in **insulin-naïve** people with T2DM uncontrolled on OADs showed an **increase** in the proportion of participants reaching **individualised glycaemic targets**



**Gla-300** also showed pronounced **HbA<sub>1c</sub> reduction** from baseline to Month 6 and Month 12 and **low rates** of **hypoglycaemia** and minimal **weight change**



Results from the **ATOS** study support the effectiveness of **Gla-300** in a **real-world setting\*** and are consistent with the data from **RCTs** and other **RWE studies** of **Gla-300**

\*Insulin-naïve people with T2DM from Asia, the Middle East, North Africa, Latin America and Eastern Europe. This infographic represents the opinions of the authors. For a full list of declarations, including funding and author disclosure statements

References

1. Sutton G, et al. Expert Opin Biol Ther. 2014;14(12):1849-60

2. Ritzel R, et al. Diabetes Obes Metab. 2015;17(9):859-67. doi: 10.1111/dom.12485.

3. Ji L, et al. Diabetes Obes Metab. 2020;22(4):612-21. doi: 10.1111/dom.13936.

4. Freemantle N, et al. Curr Med Res Opin. 2020;36(4):571-81. doi: 10.1080/03007995.2019.1708287.

5. Pettus J, et al. Diabetes therapy : research, treatment and education of diabetes and related disorders. 2019;10(2):617-33. doi: 10.1007/s13300-019-0568-8.

6. Rosenstock J, et al. Diabetes Care. 2018;41(10):2147-54. doi: 10.2337/dc18-0559.

7. Zhou FL, et al. Diabetes Obes Metab. 2018;20(5):1293-7. doi: 10.1111/dom.13199.

Abbreviations  
AE, adverse event; BG, blood glucose; Gla-100, insulin glargine 100 U/ml; Gla-300, insulin glargine 300 U/mL; HbA<sub>1c</sub>, glycated haemoglobin; OAD, oral antihyperglycaemic drugs; PD, pharmacodynamic; PK, pharmacokinetic; RCT, randomised controlled trial; RWE, real-world evidence; T2DM, type 2 diabetes mellitus; SAE, serious adverse event.  
[Full manuscript](#)

The graphical abstract represents the opinions of the authors. For a full list of declarations, including funding and author disclosure statements, please see the full text online. © The authors, CC-BY-NC 2022
